# Supplementary material for: Statistical Inferences Applying Non-Parametric Data on Cyanobacterial Investigations: Contributions to Water Quality and New Trends under Global Changes on Portuguese Freshwater Ecosystems
Source: MDPI journal article supplement (doi:10.3390/toxins14090638), 2022-09-15

**Supplementary Figure S1** – Annual temperature variation. Average of the maximum temperatures observed per each sampling point and year. Porto refers to Lake City Centre 1-3, Figueira refers to Vela Lagoon, Dunas refers to Mira Lagoon and Luzim refers to Torrão and Marco Reservoir.

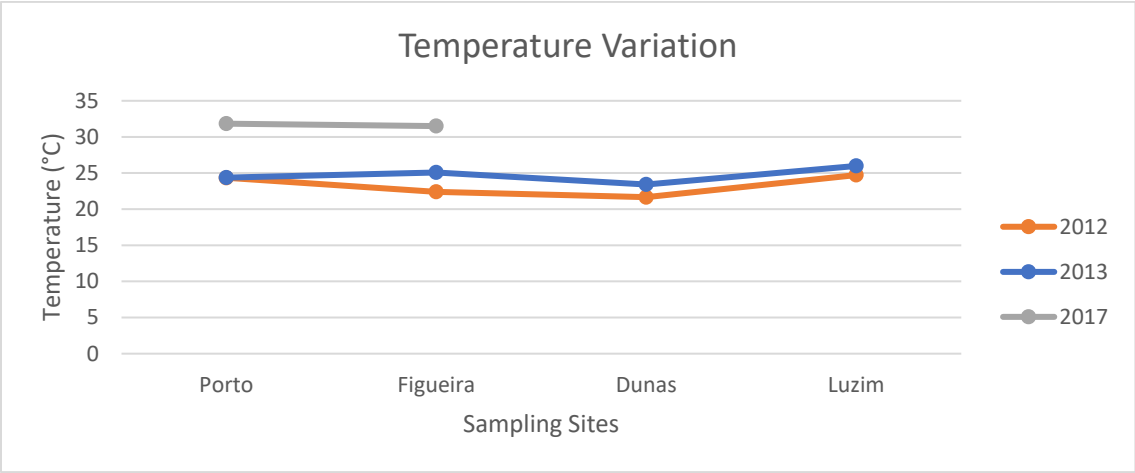

Supplement: s1 [file s1]
